# Supplementary material
Source: publisher figshare collection journal article supplement (https://gsapubs.figshare.com/articles/dataset/_/12541004)
Supplement: Supplementary file 1 [file 1]

2  
3 **SUPPLEMENTAL INFORMATION**4  
5 **TECHNIQUES FOR ESTIMATING  $D$** 

6 Numerous techniques have been developed to estimate  $D$ . We present a short  
7 summary of the techniques used to obtain the estimates of  $D$  included in the data  
8 compilation.

9 **Scarp Modeling**

10 The first estimates of  $D$  were made by modeling the evolution of fault scarps and  
11 paleo-shorelines of known ages (Nash, 1980b; Colman and Watson, 1983; Hanks et al.,  
12 1984). Multiple scarp modeling techniques have been developed (Colman and Watson,  
13 1983; Hanks and Andrews, 1989; Avouac et al., 1993) and produce differing results  
14 (Avouac and Peltzer, 1993) depending on the height of the scarp, assumptions about the  
15 initial geometry, and whether linear or nonlinear flux laws are used to estimate  $D$   
16 (Pelletier et al., 2006). The simplest solution for the evolution of a fault scarp that forms  
17 instantaneously and then evolves gradually due to creep is

18

$$z(x,t) = a * \operatorname{erf}\left(\frac{x}{2\sqrt{Dt}}\right) + bx, \quad (\text{S-1})$$

19  
20 where  $\operatorname{erf}(x,t)$  is the error function,  $a$  is half the initial vertical difference in elevation  
21 along the scarp,  $b$  is the pre-existing slope, and  $x$  is the distance from the center  
22 elevation of the scarp. The function is often evaluated at  $x=0$  and is where the scarp is  
23 predicted to experience the highest slope gradient (Hanks, 2000). More sophisticated

numerical approaches have been developed that allow the entire profile of the scarp to be analyzed (Avouac, 1993; Arrowsmith et al., 1998). Pelletier and coworkers (2006) found that methods that incorporate the entire profile of the scarp in addition to uncertainty in the initial scarp angle yield the most accurate results.

## **Laplacian and Erosion Rate**

Roering (2002) estimated  $D$  for a transient hillslope profile along the Charwell River on the South Island, New Zealand using the hillslope Laplacian and estimated erosion rates along the profile. Others (Roering et al., 2007; Perron et al., 2009; Hurst et al., 2012) have since used the ridgetop Laplacian and catchment-averaged erosion rates to estimate  $D$  in conjunction with equation (2) so that

$$D = -\frac{\rho_r}{\rho_s} \frac{E}{\nabla^2 z_R}, \quad (\text{S-2})$$

where  $\nabla^2 z_R$  is the Laplacian at the ridgeline. An important assumption required for this analysis is that the ridgeline is eroding at the same rate as the base level lowering rate  $E$  (for example, a bounding river channel). However, due to the long response time required for hillslopes to reach steady state and variability in climate through the Quaternary, this assumption is rarely perfectly met (Fernandes and Dietrich, 1997). Hillslopes are typically the last part of a landscape to respond to changes in channel incision rates or regional tectonics (Furbish and Fagherazzi, 2001). Nonetheless, evidence exists that ridgetop Laplacians do record changes in channel incision rates, albeit with a delay (Hurst et al., 2013).

## Relief and Erosion Rate

In addition to the ridgetop Laplacian and erosion rate technique, another relationship has been derived that relates  $D$ , topographic characteristics, and erosion rate. Roering and coworkers (2007) derived an analytical solution relating dimensionless relief ( $R^*$ ) and dimensionless erosion rate ( $E^*$ ):

$$R^* = \frac{1}{E^*} \left( \sqrt{1 + (E^*)^2} - \ln \left( \frac{1}{2} \left( 1 + \sqrt{1 + (E^*)^2} \right) \right) - 1 \right), \quad (\text{S-3})$$

where  $R^* = E^*/4$ ,  $E^* = (-2\nabla^2 z_R L_H) / S_c$ ,  $L_H$  is the mean hillslope length, and  $S_c$  is the critical hillslope angle at which downslope sediment fluxes become infinite. Callaghan (2012) used equation (S-3) to modify  $E^*$ , yielding

$$E^* = \frac{2E(\rho_r / \rho_s) L_H}{DS_c}, \quad (\text{S-4})$$

where  $E$  is the erosion rate and can be solved for with cosmogenic radionuclide (CRN) analysis.  $L_H$  was calculated by dividing the total basin area by twice the length of the channel network extracted from ASTER DEM data gridded to 30 m (Callaghan, 2012). Callaghan (2012) used the Peuker-Douglas algorithm to define channel heads using landscape curvature and verified the results with georeferenced satellite images.

Callaghan (2012) combined equation (S-3) and equation (S-4) to solve for  $D$  for a series of sites along a strong climate gradient along the Chilean coast.

### **Colluvial Flux and Slope**

Hughes and coworkers (2009), in a similar fashion to Reneau and coworkers (1989), estimated the mass of dated colluvium in hollows and used colluvial infilling rates to estimate  $D$ . Others (West et al., 2014; McKean et al., 1993) have determined sediment flux rates by measuring the increase in soil  $^{10}\text{Be}$  concentration with increasing distance downslope of the ridgetop and using a known rate of meteoric  $^{10}\text{Be}$  accumulation to calculate soil creep velocity. These sediment flux rates can be used in conjunction with slope gradients and equation (1) to solve for  $D$ .

### **Landscape Evolution Modeling**

Others have estimated  $D$  using landscape evolution models (LEMs) and generally utilize error-minimization techniques to tune  $D$  so that other characteristics of the landscape are reproduced by the LEM (McGuire et al., 2014; Pelletier et al., 2011; Petit et al., 2009). Roering and coworkers (1999) estimated  $D$  for a field site in the Oregon Coast Range by picking a value of  $D$  that minimized the error between predicted erosion rates using a nonlinear flux law and a long-term erosion rate determined by CRNs.

**SUPPLEMENTAL FIGURE CAPTION**

Figure DR1. Plots of  $D$  against AI for  $D$  estimated with (A) the scarp modeling technique, (B) the Laplacian and erosion rate technique, (C) the relief and erosion rate technique, and (D) the landscape evolution modeling (green circles) and colluvial flux techniques (purple triangles). Best-fit regression lines fit to the log-transformed data and corresponding  $R^2$  values are included in (A)-(C).

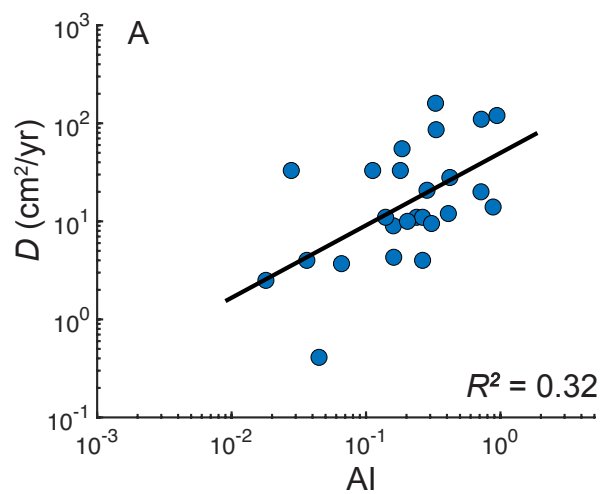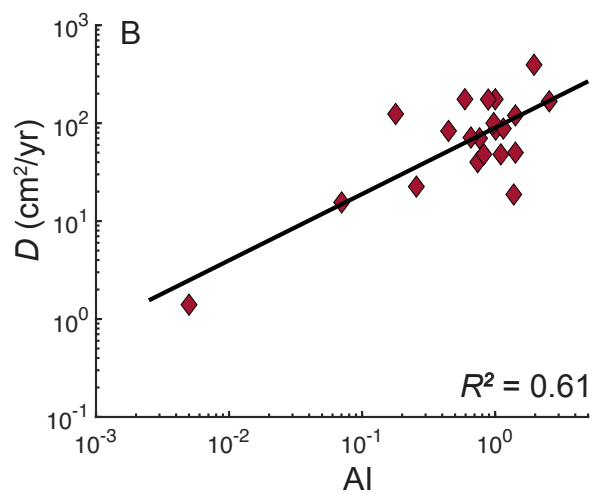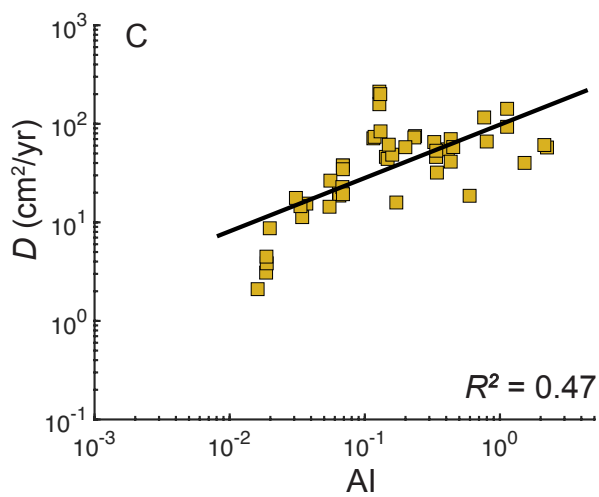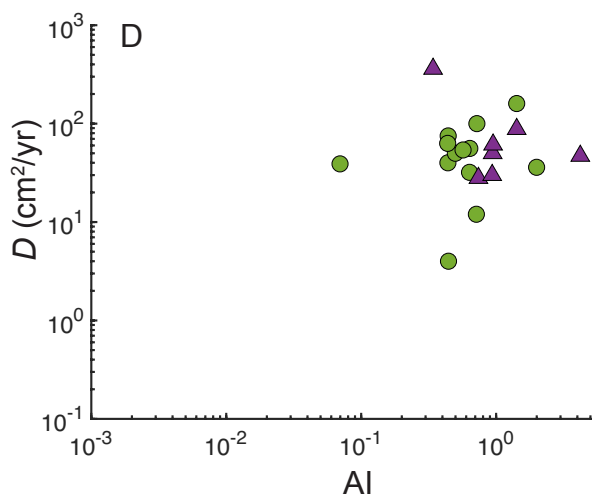

Fig. DR1

**SUPPLEMENTAL TABLE CAPTIONS**

Table DR1. Compilation of  $D$  and related data. If multiple estimates of  $D$  were made at the same site by different studies, we included all of those estimates unless there is evidence that one or more of the estimates is inaccurate. In that case, we excluded the inaccurate estimate(s) from the analysis.

Table DR2. New estimates of  $D$  made in this study and site information. If more than one erosion rate estimate exists at a site in a suitable location to estimate  $D$ , we estimated  $D$  for each erosion rate and assigned the mean of these estimates of  $D$  as the site  $D$ . We estimated the uncertainty in  $D$  as either the standard error of the mean of  $D$  or the sum in quadrature of the standard errors of individual estimates, whichever is greater. We reported the ridgetop Laplacian of each site as the mean of the unique estimates of the ridgetop Laplacian used to calculate  $D$  for the site. If there is no published estimate of  $\rho_r$  or  $\rho_s$  at the site, we use a density ratio of  $\rho_r/\rho_s = 2$  (DiBiase et al., 2010; Heimsath et al., 1999; Hurst, Mudd, Attal, et al., 2013).

**SUPPLEMENTAL TABLES**

| Source                    | Site location <sup>a</sup>                | Latitude (°) | Longitude (°) | $D^b$ (cm <sup>2</sup> /yr) | AI    | MAP (cm/yr) | Underlying lithology description                 | Lithology category <sup>c</sup> | Technique description                                                                                           | Technique category <sup>d</sup> | Vegetation description                                                         | Vegetation category <sup>c</sup> |
|---------------------------|-------------------------------------------|--------------|---------------|-----------------------------|-------|-------------|--------------------------------------------------|---------------------------------|-----------------------------------------------------------------------------------------------------------------|---------------------------------|--------------------------------------------------------------------------------|----------------------------------|
| Almond et al. [2008]      | Charwell Basin, New Zealand               | -42.450      | 173.357       | 50 ± 20                     | 1.42  | 116         | Loess underlain by fluvial gravel terraces       | 1                               | Erosion rate and curvature. Estimate is for the Holocene. Similar technique to Roering et al. (2002).           | 2                               | Podocarp, hardwood, and beech forest                                           | 3                                |
| Almond et al. [2008]      | Ahuriri, New Zealand                      | -43.702      | 172.584       | 70 ± 20                     | 0.76  | 68.8        | Thick loess deposits underlain by altered basalt | 1                               | <sup>137</sup> Cs fallout nuclides (50 yr timescale) and curvature. Similar technique to Roering et al. (2002). | 2                               | Recolonization of forest during Holocene. Recently introduced pasture grasses. | 2                                |
| Arrowsmith et al. (1998)  | Carrizo Plain, CA, USA                    | 35.271       | -119.827      | 86 ± 8                      | 0.33  | 46.7        | Conglomerate and alluvial fan units.             | 2                               | Scarp modeling                                                                                                  | 1                               | Grasses and shrubs                                                             | 2                                |
| Avouac and Peltzer (1993) | Hotan Region, Xinjiang, China             | 36.800       | 80.500        | 33 ± 14                     | 0.03  | 3.3         | Loose fan gravels                                | 1                               | Scarp modeling                                                                                                  | 1                               | Unvegetated                                                                    | 1                                |
| Avouac et al. (1993)      | Tien Shan, China                          | 44.048       | 86.790        | 55 ± 25                     | 0.19  | 18.4        | Loose fan gravels                                | 1                               | Scarp modeling                                                                                                  | 1                               | Grasses and shrubs                                                             | 2                                |
| Begin (1992)              | Northern Negev, Israel                    | 31.262       | 34.802        | 4 ± 3                       | 0.16  | 23.3        | Fluvial gravel terraces                          | 1                               | Scarp modeling                                                                                                  | 1                               | Unvegetated                                                                    | 1                                |
| Ben-Asher et al. (2017)   | Odem cinder cone, Golan Heights, Israel   | 33.197       | 35.755        | 12                          | 0.714 | 79.1        | Cinder                                           | 1                               | Assumed initial shape and age in conjunction with a numerical model                                             | 3                               | scrubland                                                                      | 2                                |
| Ben-Asher et al. (2017)   | Baron cinder cone, Golan Heights, Israel  | 33.158       | 35.779        | 32                          | 0.635 | 73          | Cinder                                           | 1                               | Assumed initial shape and age in conjunction with a numerical model                                             | 3                               | scrubland                                                                      | 2                                |
| Ben-Asher et al. (2017)   | Bental cinder cone, Golan Heights, Israel | 33.130       | 35.783        | 56                          | 0.638 | 72.8        | Cinder                                           | 1                               | Assumed initial shape and age in conjunction with a numerical model                                             | 3                               | scrubland                                                                      | 2                                |
| Ben-Asher et al. (2017)   | Shifon cinder cone, Golan Heights, Israel | 33.069       | 35.771        | 54                          | 0.569 | 66.1        | Cinder                                           | 1                               | Assumed initial shape and age in conjunction with a numerical model                                             | 3                               | scrubland                                                                      | 2                                |
| Ben-Asher et al. (2017)   | Fares cinder cones, Golan Heights,        | 32.960       | 35.865        | 63                          | 0.438 | 53.9        | Cinder                                           | 1                               | Assumed initial shape and age in conjunction with a numerical model                                             | 3                               | scrubland                                                                      | 2                                |



|                                                     |                              |        |        |          |      |      |          |   |                         |   |                                                        |   |
|-----------------------------------------------------|------------------------------|--------|--------|----------|------|------|----------|---|-------------------------|---|--------------------------------------------------------|---|
|                                                     | Israel                       |        |        |          |      |      |          |   |                         |   |                                                        |   |
| Bowman and Gerson (1986)                            | Lake Lisan, Dead Sea, Israel | 31.386 | 35.361 | 4        | 0.07 | 10.9 | Gravel   | 1 | Scarp modeling          | 1 | Unvegetated                                            | 1 |
| Bowman and Gross (1989) as reported in Hanks (2000) | Northern Arava, Israel       | 30.658 | 35.240 | > 4 (4)  | 0.04 | 6    | Gravel   | 1 | Scarp modeling          | 1 | Unvegetated                                            | 1 |
| Callaghan (2012)                                    | Chile                        | -32.99 | -71.42 | 55 ± 24  | 0.41 | 48.2 | Granitic | 3 | Relief and erosion rate | 5 | Mostly herbaceous with some trees                      | 3 |
| Callaghan (2012)                                    | Chile                        | -32.98 | -71.42 | 70 ± 36  | 0.43 | 51.8 | Granitic | 3 | Relief and erosion rate | 5 | Mostly herbaceous with some trees                      | 3 |
| Callaghan (2012)                                    | Chile                        | -32.98 | -71.42 | 41 ± 20  | 0.43 | 51.8 | Granitic | 3 | Relief and erosion rate | 5 | Mostly herbaceous with some trees                      | 3 |
| Callaghan (2012)                                    | Chile                        | -32.94 | -71.43 | 46 ± 20  | 0.34 | 39.7 | Granitic | 3 | Relief and erosion rate | 5 | Mostly herbaceous with some trees                      | 3 |
| Callaghan (2012)                                    | Chile                        | -33.01 | -71.44 | 58 ± 27  | 0.45 | 53.1 | Granitic | 3 | Relief and erosion rate | 5 | Herbaceous with few trees                              | 2 |
| Callaghan (2012)                                    | Chile                        | -31.12 | -71.58 | 46 ± 7   | 0.14 | 16.7 | Granitic | 3 | Relief and erosion rate | 5 | Mostly herbaceous with some trees                      | 3 |
| Callaghan (2012)                                    | Chile                        | -31.12 | -71.56 | 44 ± 13  | 0.15 | 16.7 | Granitic | 3 | Relief and erosion rate | 5 | Mostly herbaceous with some trees                      | 3 |
| Callaghan (2012)                                    | Chile                        | -31.12 | -71.55 | 49 ± 13  | 0.16 | 18.3 | Granitic | 3 | Relief and erosion rate | 5 | Mostly herbaceous with few trees with some bare ground | 2 |
| Callaghan (2012)                                    | Chile                        | -30.55 | -71.63 | 158 ± 68 | 0.13 | 13.8 | Granitic | 3 | Relief and erosion rate | 5 | Mostly herbaceous with some trees                      | 3 |
| Callaghan (2012)                                    | Chile                        | -30.55 | -71.63 | 212 ± 92 | 0.13 | 13.8 | Granitic | 3 | Relief and erosion rate | 5 | Mostly herbaceous with few trees and some bare ground  | 2 |
| Callaghan (2012)                                    | Chile                        | -29.62 | -71.20 | 38 ± 13  | 0.07 | 7.6  | Granitic | 3 | Relief and erosion rate | 5 | Mostly herbaceous with few trees and some bare ground  | 2 |
| Callaghan (2012)                                    | Chile                        | -29.62 | -71.20 | 38 ± 11  | 0.07 | 7.6  | Granitic | 3 | Relief and erosion rate | 5 | Mostly herbaceous with few trees and some bare ground  | 2 |
| Callaghan (2012)                                    | Chile                        | -29.62 | -71.20 | 35 ± 12  | 0.07 | 7.6  | Granitic | 3 | Relief and erosion rate | 5 | Mostly herbaceous with few trees and some bare ground  | 2 |
| Callaghan (2012)                                    | Chile                        | -29.58 | -71.14 | 20 ± 7   | 0.06 | 7.3  | Granitic | 3 | Relief and erosion rate | 5 | Mostly herbaceous with few trees and some bare         | 2 |

|                  |       |        |        |          |      |      |          |   |                         |   |                                                       |   |
|------------------|-------|--------|--------|----------|------|------|----------|---|-------------------------|---|-------------------------------------------------------|---|
|                  |       |        |        |          |      |      |          |   |                         |   | ground                                                |   |
| Callaghan (2012) | Chile | -29.57 | -71.16 | 19 ± 7   | 0.06 | 7.4  | Granitic | 3 | Relief and erosion rate | 5 | Mostly herbaceous with few trees and some bare ground | 2 |
| Callaghan (2012) | Chile | -29.22 | -71.18 | 27 ± 9   | 0.06 | 6.5  | Granitic | 3 | Relief and erosion rate | 5 | Mixture of herbaceous groundcover and bare ground     | 2 |
| Callaghan (2012) | Chile | -29.23 | -71.18 | 14 ± 5   | 0.05 | 6.5  | Granitic | 3 | Relief and erosion rate | 5 | Mixture of herbaceous groundcover and bare ground     | 2 |
| Callaghan (2012) | Chile | -28.41 | -71.05 | 16 ± 7   | 0.04 | 4.7  | Granitic | 3 | Relief and erosion rate | 5 | Mostly bare ground with some herbaceous ground cover  | 1 |
| Callaghan (2012) | Chile | -28.40 | -71.06 | 11 ± 5   | 0.03 | 4.5  | Granitic | 3 | Relief and erosion rate | 5 | Bare ground                                           | 1 |
| Callaghan (2012) | Chile | -28.39 | -71.07 | 15 ± 7   | 0.03 | 4.3  | Granitic | 3 | Relief and erosion rate | 5 | Bare ground                                           | 1 |
| Callaghan (2012) | Chile | -28.36 | -71.05 | 18 ± 9   | 0.03 | 4    | Granitic | 3 | Relief and erosion rate | 5 | Bare ground                                           | 1 |
| Callaghan (2012) | Chile | -26.57 | -70.44 | 2 ± 1    | 0.02 | 2    | Granitic | 3 | Relief and erosion rate | 5 | Bare ground                                           | 1 |
| Callaghan (2012) | Chile | -26.56 | -70.48 | 3 ± 1    | 0.02 | 2.3  | Granitic | 3 | Relief and erosion rate | 5 | Bare ground                                           | 1 |
| Callaghan (2012) | Chile | -26.56 | -70.51 | 4 ± 2    | 0.02 | 2.3  | Granitic | 3 | Relief and erosion rate | 5 | Bare ground                                           | 1 |
| Callaghan (2012) | Chile | -26.59 | -70.49 | 4 ± 2    | 0.02 | 2.3  | Granitic | 3 | Relief and erosion rate | 5 | Bare ground                                           | 1 |
| Callaghan (2012) | Chile | -26.57 | -70.56 | 9 ± 4    | 0.02 | 2.4  | Granitic | 3 | Relief and erosion rate | 5 | Bare ground                                           | 1 |
| Callaghan (2012) | Chile | -40.58 | -73.69 | 58 ± 17  | 2.23 | 184  | Granitic | 3 | Relief and erosion rate | 5 | Forested                                              | 5 |
| Callaghan (2012) | Chile | -40.58 | -73.60 | 61 ± 20  | 2.13 | 178  | Granitic | 3 | Relief and erosion rate | 5 | Forested                                              | 5 |
| Callaghan (2012) | Chile | -37.90 | -73.28 | 40 ± 14  | 1.52 | 169  | Granitic | 3 | Relief and erosion rate | 5 | Forested                                              | 5 |
| Callaghan (2012) | Chile | -36.97 | -73.12 | 93 ± 45  | 1.13 | 123  | Granitic | 3 | Relief and erosion rate | 5 | Forested                                              | 5 |
| Callaghan (2012) | Chile | -36.97 | -73.12 | 142 ± 65 | 1.13 | 123  | Granitic | 3 | Relief and erosion rate | 5 | Forested                                              | 5 |
| Callaghan (2012) | Chile | -35.84 | -72.51 | 66 ± 23  | 0.80 | 90.7 | Granitic | 3 | Relief and erosion rate | 5 | Forested                                              | 4 |
| Callaghan (2012) | Chile | -35.86 | -72.48 | 116 ± 42 | 0.76 | 85.3 | Granitic | 3 | Relief and erosion rate | 5 | Forested                                              | 4 |
| Callaghan (2012) | Chile | -34.61 | -71.58 | 19 ± 12  | 0.60 | 75.5 | Granitic | 3 | Relief and erosion rate | 5 | Mostly herbaceous with few trees                      | 2 |

|                          |                                    |        |          |            |      |      |                   |   |                         |   |                                                   |   |
|--------------------------|------------------------------------|--------|----------|------------|------|------|-------------------|---|-------------------------|---|---------------------------------------------------|---|
| Callaghan (2012)         | Chile                              | -33.88 | -71.50   | 65 ± 29    | 0.33 | 42.3 | Granitic          | 3 | Relief and erosion rate | 5 | Herbaceous                                        | 2 |
| Callaghan (2012)         | Chile                              | -33.90 | -71.49   | 32 ± 14    | 0.34 | 45.2 | Granitic          | 3 | Relief and erosion rate | 5 | Herbaceous                                        | 2 |
| Callaghan (2012)         | Chile                              | -32.94 | -71.42   | 53 ± 23    | 0.34 | 39.6 | Granitic          | 3 | Relief and erosion rate | 5 | Mostly herbaceous with some trees                 | 3 |
| Callaghan (2012)         | Chile                              | -32.27 | -71.41   | 75 ± 31    | 0.24 | 30.1 | Granitic          | 3 | Relief and erosion rate | 5 | Mostly herbaceous with some trees                 | 3 |
| Callaghan (2012)         | Chile                              | -32.27 | -71.40   | 73 ± 38    | 0.23 | 30   | Granitic          | 3 | Relief and erosion rate | 5 | Mostly herbaceous with some trees                 | 3 |
| Callaghan (2012)         | Chile                              | -32.08 | -71.42   | 58 ± 28    | 0.20 | 25.9 | Granitic          | 3 | Relief and erosion rate | 5 | Mostly herbaceous with some trees                 | 3 |
| Callaghan (2012)         | Chile                              | -31.56 | -71.42   | 61 ± 16    | 0.15 | 18.8 | Granitic          | 3 | Relief and erosion rate | 5 | Mostly herbaceous                                 | 2 |
| Callaghan (2012)         | Chile                              | -31.52 | -71.42   | 16 ± 4     | 0.17 | 20.8 | Granitic          | 3 | Relief and erosion rate | 5 | Mostly herbaceous with some trees                 | 3 |
| Callaghan (2012)         | Chile                              | -30.52 | -71.66   | 71 ± 29    | 0.12 | 12.6 | Granitic          | 3 | Relief and erosion rate | 5 | Mostly herbaceous with some trees                 | 3 |
| Callaghan (2012)         | Chile                              | -30.53 | -71.66   | 74 ± 30    | 0.12 | 13   | Granitic          | 3 | Relief and erosion rate | 5 | Mostly herbaceous with few trees                  | 2 |
| Callaghan (2012)         | Chile                              | -30.55 | -71.62   | 84 ± 37    | 0.13 | 14   | Granitic          | 3 | Relief and erosion rate | 5 | Mostly herbaceous with some trees                 | 3 |
| Callaghan (2012)         | Chile                              | -30.57 | -71.63   | 200 ± 88   | 0.13 | 14   | Granitic          | 3 | Relief and erosion rate | 5 | Mostly herbaceous with few trees                  | 2 |
| Callaghan (2012)         | Chile                              | -29.65 | -71.11   | 23 ± 8     | 0.07 | 7.5  | Granitic          | 3 | Relief and erosion rate | 5 | Mostly bare ground                                | 1 |
| Callaghan (2012)         | Chile                              | -29.67 | -71.16   | 19 ± 7     | 0.07 | 7.7  | Granitic          | 3 | Relief and erosion rate | 5 | Mixture of herbaceous groundcover and bare ground | 2 |
| Carretier et al. (2002)  | Gurvan Bugd fault system, Mongolia | 44.840 | 100.303  | 33 ± 17    | 0.18 | 13.9 | Gravel            | 1 | Scarp modeling          | 1 | Unvegetated                                       | 1 |
| Colman and Watson (1983) | Lane Bonneville, UT, USA           | 39.625 | -113.211 | 9          | 0.16 | 19.9 | Gravel            | 1 | Scarp modeling          | 1 | Grasses and shrubs                                | 2 |
| Enzel et al. (1996)      | Southern Arava Valley, Israel      | 29.612 | 34.983   | 2-3 (2.5)  | 0.02 | 3.1  | Sandy gravel      | 1 | Scarp modeling          | 1 | Unvegetated                                       | 1 |
| Hanks (2000)             | Lost River, ID, USA                | 44.166 | -113.870 | 9-10 (9.5) | 0.31 | 28.3 | Alluvial gravel   | 1 | Scarp modeling          | 1 | Sagebrush and grasses                             | 2 |
| Hanks and Wallace (1985) | Lake Lahonta, NV, USA              | 40.152 | -117.925 | 11         | 0.14 | 18.8 | Alluvial deposits | 1 | Scarp modeling          | 1 | Some vegetation                                   | 2 |

|                          |                                  |          |            |             |      |      |                                            |   |                                                                                      |   |                                                                                                                                                                |   |
|--------------------------|----------------------------------|----------|------------|-------------|------|------|--------------------------------------------|---|--------------------------------------------------------------------------------------|---|----------------------------------------------------------------------------------------------------------------------------------------------------------------|---|
| Hanks et al. (1984)      | Lake Bonneville, UT, USA         | 39.613   | -112.299   | 11          | 0.24 | 29.5 | Gravels                                    | 1 | Scarp modeling                                                                       | 1 | Grasses and shrubs                                                                                                                                             | 2 |
| Hanks et al. (1984)      | Santa Cruz sea cliffs, CA, USA   | 36.984   | -122.127   | 110         | 0.72 | 79.8 | Mudstone                                   | 2 | Scarp modeling                                                                       | 1 | The lower terraces are farmed while the upper terraces are covered with grasslands. The lower terraces have never been forested (Rosenbloom & Anderson, 1994). | 2 |
| Hanks et al. (1984)      | Raymond Fault Scarp, LA, CA, USA | 34.119   | -118.131   | 160         | 0.33 | 46.2 | Coarse alluvial deposits                   | 1 | Scarp modeling                                                                       | 1 | Grasses and some trees                                                                                                                                         | 3 |
| Hanks et al. (1984)      | Drum Mtns., UT, USA              | 39.650   | -112.136   | 11          | 0.26 | 32.6 | Alluvial gravels                           | 1 | Scarp modeling                                                                       | 1 | Low shrubs such as sagebrush and shadscale                                                                                                                     | 2 |
| Heimsath et al. (2000)   | Nunnock River, SE Australia      | -36.605  | 149.493    | 40          | 0.74 | 86.9 | Granodiorite                               | 3 | Laplacian of whole slope and erosion rate                                            | 2 | Schlerophyll forest                                                                                                                                            | 3 |
| Heimsath et al. (2005)   | Nunnock River, SE Australia      | -36.605  | 149.493    | 28          | 0.74 | 86.9 | Granodiorite                               | 3 | Sediment flux from depth-integrated soil production rates and depth*gradient product | 4 | Schlerophyll forest                                                                                                                                            | 3 |
| Hughes et al. (2009)     | Charwell Basin, New Zealand      | -42.450  | 173.357    | 88          | 1.42 | 116  | Loess underlain by fluvial gravel terraces | 1 | Sediment flux from deposits and slope                                                | 4 | Podocarp and beech forest                                                                                                                                      | 3 |
| Hurst et al. (2012)      | Feather River, CA, USA           | 39.652   | -121.312   | 86          | 1.01 | 117  | Granitoids                                 | 3 | Best-fit $D$ for 21 sites w/ridgetop Laplacians and cosmogenic-derived erosion rates | 2 | Mixed conifer forest                                                                                                                                           | 4 |
| Hurst et al. (2013)      | Feather River, CA, USA           | 39.724   | -121.285   | $48 \pm 18$ | 1.10 | 113  | Metavolcanics                              | 3 | Rdidgetop Laplacian and erosion rates                                                | 2 | Mixed conifer forest                                                                                                                                           | 4 |
| Hurst et al. (2013)      | Feather River, CA, USA           | 39.710   | -121.262   | $88 \pm 33$ | 1.15 | 150  | Granodiorite                               | 3 | Ridgetop Laplacian and erosion rates                                                 | 2 | Mixed conifer forest                                                                                                                                           | 4 |
| Mattson and Bruhn (2001) | Lake Bonneville, UT, USA         | 40.48919 | -112.32627 | $12 \pm 3$  | 0.41 | 43.7 | Alluvial shoreline deposits                | 1 | Scarp modeling                                                                       | 1 | Scrubland with some trees                                                                                                                                      | 2 |
| Mattson and Bruhn (2001) | Wasatch Fault Zone, UT, USA      | 40.72359 | -111.82325 | $28 \pm 11$ | 0.42 | 49.1 | Alluvial gravels                           | 1 | Scarp modeling                                                                       | 1 | Scrubland with some trees                                                                                                                                      | 2 |

|                            |                                                                                  |        |          |          |      |      |                                                        |   |                                                                                                       |   |                                                                                                                                                      |   |
|----------------------------|----------------------------------------------------------------------------------|--------|----------|----------|------|------|--------------------------------------------------------|---|-------------------------------------------------------------------------------------------------------|---|------------------------------------------------------------------------------------------------------------------------------------------------------|---|
| McGuire (2014).            | San Francisco Volcanic Field in northern Arizona (SFVF) Springerville Volcanic   | 35.390 | -111.570 | 40       | 0.44 | 49.3 | Basaltic cinder cones                                  | 1 | Assumed initial shape and age in conjunction with a numerical model                                   | 3 | Pinyon pine, sagebrush at lower elevation to Ponderosa pine forests at higher elevation                                                              | 3 |
| McGuire (2014).            | Field in east-central Arizona (SVF) Medicine Lake                                | 34.190 | -109.570 | 50       | 0.50 | 56.4 | Basaltic cinder cones                                  | 1 | Assumed initial shape and age in conjunction with a numerical model                                   | 3 | Ponderosa pine, Gambel oak, alligator bark juniper, Douglas fir, pinyon pine, sagebrush and juniper in lower elevations                              | 3 |
| McGuire (2014).            | Volcanic Field in northeastern California (MLVF) East Bay Regional Park, CA, USA | 41.640 | -121.740 | 75       | 0.44 | 45.2 | Basaltic and basaltic/andesitic cones                  | 1 | Assumed initial shape and age in conjunction with a numerical model                                   | 3 | Lodgepole pine, ponderosa, Jeffrey pine, sugar pine, western white pine. Red and white fir at higher elevations. Western juniper at lower elevations | 3 |
| McKean et al. (1993)       |                                                                                  | 37.974 | -121.865 | 360 ± 55 | 0.34 | 43.1 | Marine shale                                           | 2 | Qs and slope                                                                                          | 4 | Grasslands                                                                                                                                           | 2 |
| Nash (1980a)               | Emmet County, MI, USA                                                            | 45.575 | -85.113  | 120      | 0.94 | 77.9 | Cohesionless sand and gravel moraine deposits          | 1 | Scarp modeling                                                                                        | 1 | Native hardwoods with scattered white pine and hemlocks, pine, oak, and beech                                                                        | 4 |
| Nash (1980b)               | Drum Mtns., UT, USA                                                              | 39.650 | -112.136 | 4        | 0.26 | 32.6 | Alluvial gravels                                       | 1 | Scarp modeling                                                                                        | 1 | Low shrubs such as sagebrush and shadscale                                                                                                           | 2 |
| Nash (1984)                | Hebgen Lake, MT, USA                                                             | 44.701 | -111.204 | 20 ± 2.4 | 0.72 | 62.2 | Sand and gravel                                        | 1 | Scarp modeling                                                                                        | 1 | Prairie grasses and some pine trees                                                                                                                  | 3 |
| Niviere and Marquis (2000) | Upper Rhine Graben, Germany                                                      | 47.637 | 7.516    | 14       | 0.88 | 73   | Fluvial gravels and coarse sands                       | 1 | Estimate from both scarp modeling and from estimating sediment volume at the toe of a man-made scarp. | 1 | Forested                                                                                                                                             | 4 |
| Pelletier and Cline (2007) | Lathrop Wells, NV, USA                                                           | 36.690 | -116.510 | 39       | 0.07 | 10.9 | Loose vesicular scoria lapilli                         | 1 | Numerical modeling using initial and current shape. Age of cone is 77 ka from radiometric dating      | 3 | Mostly unvegetated                                                                                                                                   | 1 |
| Pelletier et al. (2006)    | Lake Bonneville, UT, USA                                                         | 39.400 | -113.700 | 10       | 0.20 | 25   | Alluvial shoreline scarps (mostly sand and/or gravels) | 1 | Compared midpoint-slope-inverse method, slope-offset method, and full-scarp method                    | 1 | Grasses and shrubs                                                                                                                                   | 2 |

|                                                  |                                                 |         |          |               |      |      |                                                                                                      |   |                                                                                                                     |   |                                                                                        |   |
|--------------------------------------------------|-------------------------------------------------|---------|----------|---------------|------|------|------------------------------------------------------------------------------------------------------|---|---------------------------------------------------------------------------------------------------------------------|---|----------------------------------------------------------------------------------------|---|
| Pelletier et al. (2011)                          | Banco Bonito lava flow, Valles Caldera, NM, USA | 36.840  | -106.590 | 3-7 (4)       | 0.44 | 48.2 | Rhyolite                                                                                             | 3 | Measured soil thickness and known age of lava flow to test a nonlinear, numerical LEM and choose the best parameter | 3 | Ponderosa pine, gamble oak scrublands, and mixed conifer forest                        | 3 |
| Perron et al. (2012)                             | Allegheny Plateau, PA, USA                      | 39.971  | -80.261  | 100 ± 8       | 0.98 | 105  | Sandstone                                                                                            | 2 | Ridgetop Laplacian and erosion rate                                                                                 | 2 | Deciduous forest                                                                       | 4 |
| Perron et al. (2012)                             | Gabilan Mesa, CA, USA                           | 35.923  | -120.826 | 124 ± 19      | 0.18 | 28.4 | Poorly consolidated conglomerate                                                                     | 2 | Ridgetop Laplacian and erosion rate                                                                                 | 2 | Grasses and oaks                                                                       | 3 |
| Pierce and Colman (1986)                         | Big Lost River Valley, ID, USA                  | 43.809  | -113.336 | ~1-87 (21)    | 0.28 | 28.3 | Carbonate gravels and sands                                                                          | 1 | Scarp modeling of analytical solution with error function                                                           | 1 | South-facing slopes are shrub desert and the north-facing slopes are prairie grassland | 2 |
| Reneau (1988) reported in Heimsath et al. (2005) | Tennessee Valley, CA, USA                       | 37.863  | -122.550 | 50            | 0.94 | 94.2 | Intensely sheared thrust sheets of greenstone, greywacke sandstone and chert (Franciscan assemblage) | 2 | Colluvial infilling of landslide deposits                                                                           | 4 | Coastal grassland and scrub                                                            | 2 |
| Reneau (1988) reported in Heimsath et al. (2005) | Point Reyes, CA, USA                            | 38.047  | -122.852 | 30            | 0.93 | 99.1 | Quartz diorite and granodiorite                                                                      | 3 | Colluvial infilling of landslide deposits                                                                           | 4 | Bishop pine forest                                                                     | 4 |
| Reneau et al. (1989)                             | Clearwater River, WA, USA                       | 47.660  | -124.000 | 47            | 4.20 | 311  | Silts, sandstones and conglomerates                                                                  | 2 | Qs estimates from dating hollow deposits (~10,000 yr timescale) and slope.                                          | 4 | Western hemlock and Pacific silver fir forest                                          | 5 |
| Riggins et al. (2011)                            | Bodmin Moor, Cornwall, UK                       | 50.508  | -4.439   | 394 ± 163 (6) | 1.96 | 114  | Granite                                                                                              | 3 | Ridgetop Laplacian and soil production rate                                                                         | 2 | Grasses, (previously hazel, and oak woodland)                                          | 4 |
| Roering et al. (1999)                            | Sullivan Creek, OR, USA                         | 43.463  | -124.119 | 36 ± 16       | 2.00 | 168  | Turbidite beds (Tyee Formation)                                                                      | 2 | Minimized error between modeled erosion rates and measured erosion rates for non-linear erosion equation.           | 3 | Douglas fir and mixed conifer forest                                                   | 4 |
| Roering et al. (2002)                            | Charwell River, South Island, New Zealand       | -42.450 | 173.357  | 120 ± 80      | 1.42 | 116  | 5m thick loess cap on top of fluvial gravel terraces                                                 | 1 | Curvature and timescale of vegetation-driven creep (9K yr) on slope                                                 | 2 | Podocarp and beech forest                                                              | 3 |

|                                |                                           |         |          |              |      |      |                                                                                                      |   |                                                                                                               |   |                                                                                                                                  |   |
|--------------------------------|-------------------------------------------|---------|----------|--------------|------|------|------------------------------------------------------------------------------------------------------|---|---------------------------------------------------------------------------------------------------------------|---|----------------------------------------------------------------------------------------------------------------------------------|---|
| Roering et al. (2004)          | Charwell River, South Island, New Zealand | -42.450 | 173.357  | 160 ± 50     | 1.42 | 116  | Loess underlain by fluvial gravel terraces                                                           | 1 | Numerical modeling in a similar style to scarp diffusion (but assumes initial loess surface geometry instead) | 3 | Podocarp and beech forest                                                                                                        | 3 |
| Rosenbloom and Anderson (1994) | Santa Cruz, CA, USA                       | 36.984  | -122.127 | 100          | 0.72 | 79.8 | Mudstone                                                                                             | 2 | Numerical model with best-fit D                                                                               | 3 | The lower terraces are farmed while the upper terraces are covered with grasslands. The lower terraces have never been forested. | 2 |
| Small et al. (1999)            | Wind River Range, WY, USA                 | 43.370  | -109.750 | 176 ± 12 (2) | 1.00 | 60.3 | Granite and gneiss                                                                                   | 3 | Ridgetop Laplacian and erosion rates                                                                          | 2 | Mostly unvegetated                                                                                                               | 6 |
| Spelz et al. (2008)            | Laguna Salada, Baja California, Mexico    | 32.075  | -115.383 | 0.4 ± 0.3    | 0.04 | 8.3  | Gravel terraces                                                                                      | 1 | Finite-slope and infinite-slope scarp modeling technique                                                      | 1 | Mostly unvegetated, but some vegetation near active fans and channel bars.                                                       | 1 |
| Tapponnier et al. (1990)       | Qilian Shan, China                        | 39.262  | 99.608   | 33 ± 17      | 0.11 | 11.9 | Fanglomerates                                                                                        | 1 | Scarp modeling                                                                                                | 1 | Mostly unvegetated                                                                                                               | 1 |
| This study                     | Great Smokey Mountains, NC, USA           | 35.622  | -83.204  | 19 ± 1       | 1.38 | 154  | Quartzite                                                                                            | 3 | Ridgetop Laplacian and erosion rates                                                                          | 2 | Deciduous forest                                                                                                                 | 4 |
| This study                     | San Bernardino Mountains, CA, USA         | 34.051  | -116.934 | 176 ± 21     | 0.59 | 72.9 | Primarily granitic rocks (quartz monzonite and gneiss)                                               | 3 | Ridgetop Laplacian and erosion rates                                                                          | 2 | Chaparral and oak                                                                                                                | 3 |
| This study                     | Wasatch Mountains, UT, USA                | 40.892  | -111.865 | 83 ± 15      | 0.45 | 51.5 | Gneiss                                                                                               | 3 | Ridgetop Laplacian and erosion rates                                                                          | 2 | Patchy vegetation with trees, sage, and grasses                                                                                  | 3 |
| This study                     | San Gabriel Mountains, CA, USA            | 34.364  | -117.992 | 71 ± 12      | 0.66 | 77.1 | Primarily granitic and metamorphic rocks.                                                            | 3 | Ridgetop Laplacian and erosion rates                                                                          | 2 | Chaparral, deciduous and conifers                                                                                                | 3 |
| This study                     | Tennessee Valley, CA, USA                 | 37.850  | -122.550 | 174 ± 21     | 0.89 | 84.4 | Intensely sheared thrust sheets of greenstone, greywacke sandstone and chert (Franciscan assemblage) | 2 | Ridgetop Laplacian and erosion rates                                                                          | 2 | Coastal grassland and scrub                                                                                                      | 2 |
| This study                     | Oregon Coast Range, OR, USA               | 44.517  | -123.844 | 167 ± 37     | 2.55 | 223  | Tyee Sandstone                                                                                       | 3 | Ridgetop Laplacian and erosion rates                                                                          | 2 | Dense coniferous forest                                                                                                          | 4 |

|                                 |                                                       |         |          |                 |      |      |                                                                        |   |                                                                                                                                      |   |                                                               |   |
|---------------------------------|-------------------------------------------------------|---------|----------|-----------------|------|------|------------------------------------------------------------------------|---|--------------------------------------------------------------------------------------------------------------------------------------|---|---------------------------------------------------------------|---|
| This study                      | Blasingame, CA, USA                                   | 36.954  | -119.631 | $23 \pm 3$      | 0.26 | 38.7 | Tonalite                                                               | 3 | Ridgetop Laplacian and erosion rate                                                                                                  | 2 | Oak grassland                                                 | 3 |
| This study                      | Atacama Desert, Chile                                 | -24.130 | -69.990  | $1.4 \pm 0.5$   | 0.01 | 0.7  | Granitic                                                               | 3 | Ridgetop Laplacian and erosion rates                                                                                                 | 2 | Desert                                                        | 1 |
| This study                      | Atacama Desert, Chile                                 | -29.770 | -71.080  | $16 \pm 2$      | 0.07 | 7.8  | Granitic                                                               | 3 | Ridgetop Laplacian and erosion rates                                                                                                 | 2 | Desert                                                        | 1 |
| Walther et al. (2009)           | Blue Mountains, WA, USA                               | 46.148  | -117.938 | $48 \pm 7$      | 0.82 | 74.4 | Basalt bedrock, but blanketed with loess, which controls erosion rate. | 2 | Slope of line between differential erosion rate (from glass age estimate and peak profile of Mazama ash) and differential curvature. | 2 | Coniferous forest                                             | 4 |
| West et al. (2014) <sup>f</sup> | Susquehanna Shale Hills Critical Observatory, PA, USA | 40.667  | -77.903  | $61 \pm 33$ (6) | 0.95 | 97.6 | Shale                                                                  | 2 | Meteoric <sup>10</sup> Be and slope                                                                                                  | 4 | Deciduous forest on hillslopes and hemlock and pine in valley | 4 |

<sup>a</sup>If the exact location was not able to be identified, we used the location that best matched the site description. If multiple measurements were made for a region, we report the mean lat/lon for the study.

<sup>b</sup>Uncertainties are reported as they were presented in the original journals. If uncertainties were not reported, we calculated and reported the standard deviation of  $D$  and the number of estimates when possible. When a range is reported, we reported the value of  $D$  used in our analysis in parenthesis.

<sup>c</sup>Rock category: 1 = unconsolidated, 2 = sedimentary, 3 = Igneous/metamorphic.

<sup>d</sup>Technique category: 1 = Scarp modeling, 2 = Laplacian and erosion rates, 3 = LEM, 4 = Colluvial flux and slope, 5 = erosion rate and Laplacian.

<sup>e</sup>Vegetation category: 1 = Arid/desert, 2 = grasslands/scrublands, 3 = savannah/lightly forested, 4=forested.

<sup>f</sup>West et al. (2014) reported the range of  $D$  for north-facing and south-facing slopes. We reported the mean of these values.

**Table DR2**

| Site Location                   | Bedrock Erosion Rate (m/Myr) | Ridgetop Laplacian ( $\times 10^{-3}$ 1/m) | $\rho_r/\rho_s$ | $D$ ( $\text{cm}^2/\text{yr}$ ) | Source of erosion rates                                                                    | Source of topographic data |
|---------------------------------|------------------------------|--------------------------------------------|-----------------|---------------------------------|--------------------------------------------------------------------------------------------|----------------------------|
| Great Smokey Mountains, NC, USA | $27 \pm 2$                   | $-28.2 \pm 4.3$                            | 2               | $19 \pm 1$                      | Rate from Portenga and Bierman (2011). Rate originally determined by Matmon et al. (2003). | OpenTopo <sup>a</sup>      |



|                                   |            |              |      |          |                                                                                              |                       |
|-----------------------------------|------------|--------------|------|----------|----------------------------------------------------------------------------------------------|-----------------------|
| San Bernardino Mountains, CA, USA | 1373 ± 148 | -157.3 ± 7.3 | 2    | 175 ± 21 | Rate from Willenbring et al. (2013). Rate originally determined by Binnie et al. (2007).     | OpenTopo <sup>a</sup> |
| Wasatch Mountains, UT, USA        | 89 ± 9     | -24.7 ± 0.6  | 2    | 83 ± 15  | Rate from Willenbring et al. (2013). Rate originally determined by Stock et al. (2009).      | OpenTopo <sup>b</sup> |
| San Gabriel Mountains, CA, USA    | 108 ± 17   | -30.2 ± 0.6  | 2    | 71 ± 12  | Rate from Willenbring et al. (2013). Rate originally determined by DiBiase et al. (2010)     | OpenTopo <sup>a</sup> |
| Tennessee Valley, CA, USA         | 102 ± 23   | -11.6 ± 1.4  | 2    | 174 ± 21 | Rate from Portenga and Bierman (2011). Rate originally determined by Heimsath et al. (1997). | OpenTopo <sup>a</sup> |
| Oregon Coast Range, OR, USA       | 155 ± 30   | -18.9 ± 2.4  | 2.27 | 206 ± 45 | Rate from Portenga and Bierman (2011). Rate originally determined by Bierman et al. (2001).  | OpenTopo <sup>a</sup> |
| Blasingame, CA, USA               | 30 ± 4     | -26.9 ± 0.4  | 2    | 22 ± 3   | Dixon et al. (2009)                                                                          | OpenTopo <sup>a</sup> |
| Atacama Desert, Chile             | 1 ± 0      | -24.6 ± 6.0. | 3.25 | 1 ± 1    | Owen et al. (2011)                                                                           | J. Owen               |
| Atacama Desert, Chile             | 27 ± 3     | -29.1 ± 1.2  | 1.69 | 16 ± 2   | Owen et al. (2011)                                                                           | J. Owen               |

<sup>a</sup>Data downloaded from OpenTopography (<http://opentopo.sdsc.edu>). Lidar data acquisition and processing completed by the National Center for Airborne Laser Mapping (NCALM – <http://www.ncalm.org>). NCALM funding provided by NSF's Division of Earth Sciences, Instrumentation and Facilities Program.

<sup>b</sup>Data downloaded from OpenTopography (<http://opentopo.sdsc.edu>). Data collected by the State of Utah and its partners.

## SUPPLEMENTAL REFERENCES

Almond, P.C., Roering, J.J., Hughes, M.W., Lutter, F.S., and Leboutteiller, C., 2008, Climatic and anthropogenic effects on soil transport rates and hillslope evolution: Sediment Dynamics in Changing Environments, v. Christchurch, New Zealand, p. 417–424.

Arrowsmith, J.R., Rhodes, D.D., and Pollard, D.D., 1998, Morphologic dating of scarps formed by repeated slip events along the San Andreas Fault, Carrizo Plain, California: Journal of Geophysical Research, v. 103, p. 10141–10160.

Avouac, J.P., 1993, Analysis of Scarp Profiles: Evaluation of Errors in Morphologic Dating: Journal of Geophysical Research, v. 98,

146 p. 6745, doi: 10.1029/92JB01962.

147 Avouac, J.P., and Peltzer, G., 1993, Active tectonics in southern Xinjiang, China: Analysis of terrace riser and normal fault scarp  
 148 degradation along the Hotan-Qira Fault System: *Journal of Geophysical Research: Solid Earth* (1978–2012), v. 98, p. 21773–  
 149 21807, doi: 10.1029/93JB02172.

150 Avouac, J.P., Tapponnier, P., Bai, M., You, H., and Wang, G., 1993, Active thrusting and folding along the northern Tien Shan and  
 151 Late Cenozoic rotation of the Tarim relative to Dzungaria and Kazakhstan: *Journal of Geophysical Research: Solid Earth* (1978–  
 152 2012), v. 98, p. 6755–6804, doi: 10.1029/92JB01963.

153 Begin, Z.B., 1992, Application of quantitative morphologic dating to paleo-seismicity of the northwestern Negev, Israel: *Israel Journal*  
 154 *of Earth Sciences*, v. 41, p. 95–103.

155 Bierman, P.R., Clapp, E.M., Nichols, K.K., Gillespie, A.R., and Caffee, M.W., 2001, Using Cosmogenic Nuclide Measurements In  
 156 Sediments To Understand Background Rates Of Erosion And Sediment Transport, *in* Harmon, R.S. and Doe, W.W. eds.,  
 157 *Landscape Erosion and Evolution Modeling*, New York, Springer US, p. 89–115, doi: 10.1007/978-1-4615-0575-4\_5.

158 Binnie, S.A., Phillips, W.M., Summerfield, M.A., and Fifield, L.K., 2007, Tectonic uplift, threshold hillslopes, and denudation rates in  
 159 a developing mountain range: *Geology*, v. 35, p. 743–5, doi: 10.1130/G23641A.1.

160 Bowman, D., and Gerson, R., 1986, Morphology of the latest Quaternary surface-faulting in the Gulf of Elat region, eastern Sinai:  
 161 *Tectonophysics*, v. 128, p. 97–119, doi: 10.1016/0040-1951(86)90310-0.

162 Carretier, S., Ritz, J.F., Jackson, J., and Bayasgalan, A., 2002, Morphological dating of cumulative reverse fault scarps: examples from  
 163 the Gurvan Bogd fault system, Mongolia: *Geophysical Journal International*, v. 148, p. 256–277.

164 Colman, S.M., and Watson, K., 1983, Ages estimated from a diffusion equation model for scarp degradation: *Science*, v. 221, p. 263–  
 165 265, doi: 10.1126/science.221.4607.263.

166 DiBiase, R.A., Whipple, K.X., Heimsath, A.M., and Ouimet, W.B., 2010, Landscape form and millennial erosion rates in the San  
 167 Gabriel Mountains, CA: *Earth and Planetary Science Letters*, v. 289, p. 134–144, doi: 10.1016/j.epsl.2009.10.036.

168 Dixon, J.L., Heimsath, A.M., Kaste, J., and Amundson, R., 2009, Climate-driven processes of hillslope weathering: *Geology*, v. 37, p.  
169 975–978, doi: 10.1130/G30045A.1.

170 Enzel, Y., Amit, R., Porat, N., Zilberman, E., and Harrison, B.J., 1996, Estimating the ages of fault scarps in the Arava, Israel:  
171 *Tectonophysics*, v. 253, p. 305–317, doi: 10.1016/0040-1951(95)00072-0.

172 Fernandes, N.F., and Dietrich, W.E., 1997, Hillslope evolution by diffusive processes: The timescale for equilibrium adjustments:  
173 *Water Resources Research*, v. 33, p. 1307–1318.

174 Furbish, D.J., and Fagherazzi, S., 2001, Stability of creeping soil and implications for hillslope evolution: *Water Resources Research*,  
175 v. 37, p. 2607–2618.

176 Hanks, T.C., and Andrews, D.J., 1989, Effect of far-field slope on morphologic dating of scarplike landforms: *Journal of Geophysical*  
177 *Research: Solid Earth* (1978–2012), v. 94, p. 565–573, doi: 10.1029/JB094iB01p00565.

178 Hanks, T.C., and Wallace, R.E., 1985, Morphological analysis of the Lake Lahontan shoreline and Beachfront fault scarps, Pershing  
179 County, Nevada: *Bulletin of the Seismological Society of America*, v. 75, p. 835–846.

180 Hanks, T.C., Bucknam, R.C., Lajoie, K.R., and Wallace, R.E., 1984, Modification of wave-cut and faulting-controlled landforms:  
181 *Journal of Geophysical Research*, v. 89, p. 5771–5790.

182 Heimsath, A.M., Dietrich, W.E., Nishiizumi, K., and Finkel, R.C., 1997, The soil production function and landscape equilibrium:  
183 *Nature*, v. 388, p. 358–361.

184 Heimsath, A.M., E Dietrich, W., Nishiizumi, K., and Finkel, R.C., 1999, Cosmogenic nuclides, topography, and the spatial variation  
185 of soil depth: *Geomorphology*, v. 27, p. 151–172, doi: 10.1016/S0169-555X(98)00095-6.

186 Hurst, M.D., Mudd, S.M., Walcott, R., Attal, M., and Yoo, K., 2012, Using hilltop curvature to derive the spatial distribution of  
187 erosion rates: *Journal of Geophysical Research*, v. 117, p. F02017, doi: 10.1029/2011JF002057.

188 Matmon, A., Bierman, P.R., Larsen, J., Southworth, S., Pavich, M., Finkel, R.C., and Caffee, M.W., 2003, Erosion of an Ancient  
189 Mountain Range, The Great Smoky Mountains, North Carolina and Tennessee: v. 303, p. 817–855, doi: 10.2475/ajs.303.9.817.

190 Mattson, A., and Bruhn, R.L., 2001, Fault slip rates and initiation age based on diffusion equation modeling: Wasatch Fault Zone and  
 191 eastern Great Basin: *Journal of Geophysical Research: Solid Earth* (1978–2012), v. 106, p. 13739–13750, doi:  
 192 10.1029/2001JB900003.

193 Nash, D., 1980a, Forms of bluffs degraded for different lengths of time in emmet county, Michigan, U.S.A.: *Earth Surface Processes*,  
 194 v. 5, p. 331–345, doi: 10.1002/esp.3760050405.

195 Nash, D.B., 1980b, Morphologic dating of degraded normal fault scarps: *The Journal of Geology*, doi: 10.2307/30062456.

196 Nash, D.B., 1984, Morphologic dating of fluvial terrace scarps and fault scarps near West Yellowstone, Montana: *Geological Society  
 197 of America Bulletin*, v. 95, p. 1413–1424, doi: 10.1130/0016-7606(1984)95<1413:MDOFTS>2.0.CO;2.

198 Niviere, B., and Marquis, G., 2000, Evolution of terrace risers along the upper Rhine graben inferred from morphologic dating  
 199 methods: evidence of climatic and tectonic forcing: *Geophysical Journal International*, v. 141, p. 577–594, doi: 10.1046/j.1365-  
 200 246x.2000.00123.x.

201 Pelletier, J.D., and Cline, M.L., 2007, Nonlinear slope-dependent sediment transport in cinder cone evolution: *Geology*, doi:  
 202 10.1130/G23992A.1;2figures;DataRepositoryitem2007266.

203 Pelletier, J.D., McGuire, L.A., Ash, J.L., Engelder, T.M., Hill, L.E., Leroy, K.W., Orem, C.A., Rosenthal, W.S., Trees, M.A.,  
 204 Rasmussen, C., and Chorover, J., 2011, Calibration and testing of upland hillslope evolution models in a dated landscape: Banco  
 205 Bonito, New Mexico: *Journal of Geophysical Research*, v. 116, p. F04004–24, doi: 10.1029/2011JF001976.

206 Perron, J.T., Kirchner, J.W., and Dietrich, W.E., 2009, Formation of evenly spaced ridges and valleys: *Nature*, v. 460, p. 502–505, doi:  
 207 doi:10.1038/nature08174.

208 Petit, C., Gunnell, Y., Gonga-Saholiariliva, N., Meyer, B., and Séguinot, J., 2009, Faceted spurs at normal fault scarps: Insights from  
 209 numerical modeling: *Journal of Geophysical Research*, v. 114, p. B05403–13, doi: 10.1029/2008JB005955.

210 Pierce, K.L., and Colman, S.M., 1986, Effect of height and orientation (microclimate) on geomorphic degradation rates and processes,  
 211 late-glacial terrace scarps in central Idaho: *Geological Society of America Bulletin*, v. 97, p. 869–885, doi: 10.1130/0016-  
 212 7606(1986)97<869:EOHAOM>2.0.CO;2.

- 213 Portenga, E.W., and Bierman, P.R., 2011, Understanding Earth's eroding surface with  $^{10}\text{Be}$ : *GSA Today*, v. 21, p. 4–10, doi:  
214 10.1130/G111A.1.
- 215 Reneau, S.L., 1988, Depositional and erosional history of hollows: application to landslide location and frequency, long-term erosion  
216 rates, and the effects of climatic change [Ph.D. thesis]: Berkeley, University of California, 654 p.
- 217 Reneau, S.L., Dietrich, W.E., Rubin, M., Donahue, D.J., and Jull, A.J.T., 1989, Analysis of hillslope erosion rates using dated  
218 colluvial deposits: *The Journal of Geology*, v. 97, p. 45–63, doi: 10.2307/30062184.
- 219 Riggins, S.G., Anderson, R.S., Anderson, S.P., and Tye, A.M., 2011, Solving a conundrum of a steady-state hilltop with variable soil  
220 depths and production rates, Bodmin Moor, UK: *Geomorphology*, v. 128, p. 73–84, doi: 10.1016/j.geomorph.2010.12.023.
- 221 Roering, J.J., Almond, P., Tonkin, P., and McKean, J., 2002, Soil transport driven by biological processes over millennial time scales:  
222 *Geology*, v. 30, p. 1115–1118.
- 223 Roering, J.J., Kirchner, J.W., and Dietrich, W.E., 1999, Evidence for nonlinear, diffusive sediment transport on hillslopes and  
224 implications for landscape morphology: v. 35, p. 853–870, doi: 10.1029/1998WR900090.
- 225 Roering, J.J., Perron, J.T., and Kirchner, J.W., 2007, Functional relationships between denudation and hillslope form and relief: *Earth  
226 and Planetary Science Letters*, v. 264, p. 245–258.
- 227 Rosenbloom, N.A., and Anderson, R.S., 1994, Hillslope and channel evolution in a marine terraced landscape, Santa Cruz, California:  
228 *Journal of Geophysical Research: Solid Earth* (1978–2012), v. 99, p. 14013–14029, doi: 10.1029/94JB00048.
- 229 Small, E.E., Anderson, R.S., and Hancock, G.S., 1999, Estimates of the rate of regolith production using and from an alpine hillslope:  
230 *Geomorphology*, v. 27, p. 131–150, doi: 10.1016/S0169-555X(98)00094-4.
- 231 Spelz, R.M., Fletcher, J.M., Owen, L.A., and Caffee, M.W., 2008, Quaternary alluvial-fan development, climate and morphologic  
232 dating of fault scarps in Laguna Salada, Baja California, Mexico: *Geomorphology*, v. 102, p. 578–594, doi:  
233 10.1016/j.geomorph.2008.06.001.
- 234 Stock, G.M., Frankel, K.L., Ehlers, T.A., Schaller, M., Briggs, S.M., and Finkel, R.C., 2009, Spatial and temporal variations in

- 235 denudation of the Wasatch Mountains, Utah, USA: *Lithosphere*, v. 1, p. 34–40, doi: 10.1130/L15.1.
- 236 Tapponnier, P., Meyer, B., Avouac, J.P., Peltzer, G., Gaudemer, Y., Shunmin, G., Hongfa, X., Kelun, Y., Zhitai, C., Shuahua, C., and  
237 Huagang, D., 1990, Active thrusting and folding in the Qilian Shan, and decoupling between upper crust and mantle in  
238 northeastern Tibet: *Earth and Planetary Science Letters*, v. 97, p. 382–403, doi: 10.1016/0012-821X(90)90053-Z.
- 239 Walther, S.C., Roering, J.J., Almond, P.C., and Hughes, M.W., 2009, Long-term biogenic soil mixing and transport in a hilly, loess-  
240 mantled landscape: Blue Mountains of southeastern Washington: *Catena*, v. 79, p. 170–178, doi: 10.1016/j.catena.2009.08.003.
- 241 West, N., Kirby, E., Bierman, P., and Clarke, B.A., 2014, Aspect-dependent variations in regolith creep revealed by meteoric  $^{10}\text{Be}$ :  
242 *Geology*, v. 42, p. 507–510, doi: 10.1130/G35357.1.
- 243 Willenbring, J.K., Codilean, A.T., and McElroy, B., 2013, Earth is (mostly) flat: Apportionment of the flux of continental sediment  
244 over millennial time scales: *Geology*, v. 41, p. 343–346, doi: 10.1130/G33918.1.
- 245
